# Supplementary material
Source: PubMed Central journal article supplement (PMC4971774)
Supplement: NIHMS806390-supplement-Supplementary_Table_S1.pdf [file NIHMS806390-supplement-Supplementary_Table_S1.pdf]

**Supplementary Table S1 - Overall summary of exposure to study treatment - Safety population**

|                                                    | <b>Paclitaxel<br/>(n=46)</b> | <b>Paclitaxel +<br/>w-Iniparib<br/>(n=46)</b> | <b>Paclitaxel +<br/>tw-Iniparib<br/>(n=48)</b> |
|----------------------------------------------------|------------------------------|-----------------------------------------------|------------------------------------------------|
| Total number of cycles administered (all patients) | 517                          | 517                                           | 532                                            |
| Total number of cycles administered per patient    |                              |                                               |                                                |
| Median                                             | 12.0                         | 12.0                                          | 12.0                                           |
| Min : Max                                          | 4 : 12                       | 2 : 13                                        | 5 : 12                                         |
| Duration of exposure (weeks)                       |                              |                                               |                                                |
| Median                                             | 12.0                         | 12.0                                          | 12.0                                           |
| Min : Max                                          | 4 : 15                       | 2 : 14                                        | 5 : 14                                         |
| Paclitaxel: relative dose intensity (%)            |                              |                                               |                                                |
| Median                                             | 98.8                         | 99.1                                          | 99.0                                           |
| Min : Max                                          | 80.5 : 104.1                 | 85.7 : 105.7                                  | 78.7 : 102.4                                   |
| Iniparib: relative dose intensity (%)              |                              |                                               |                                                |
| Median                                             |                              | 98.6                                          | 98.8                                           |
| Min : Max                                          |                              | 77.3 : 104.1                                  | 76.9 : 101.7                                   |
