# Supplementary material
Source: PubMed Central journal article supplement (PMC4971774)
Supplement: NIHMS806390-supplement-Supplementary_Table_S2.pdf [file NIHMS806390-supplement-Supplementary_Table_S2.pdf]

**Supplementary Table S2 - Summary of serious TEAEs by PT (worst grade by patient) -**

**Safety population**

| PT <i>n</i> (%)                  | Paclitaxel<br>( <i>n</i> =46) |           | Paclitaxel +<br>w-Iniparib<br>( <i>n</i> =46) |           | Paclitaxel +<br>tw-Iniparib<br>( <i>n</i> =48) |           |
|----------------------------------|-------------------------------|-----------|-----------------------------------------------|-----------|------------------------------------------------|-----------|
|                                  | All                           |           | All                                           |           | All                                            |           |
|                                  | grades                        | Grade 3-4 | grades                                        | Grade 3-4 | grades                                         | Grade 3-4 |
| Any serious TEAE                 | 2 (4%)                        | 0         | 2 (4%)                                        | 1 (2%)    | 2 (4%)                                         | 1 (2%)    |
| Diarrhea                         | 1 (2%)                        | 0         | 0                                             | 0         | 1 (2%)                                         | 0         |
| Radius fracture                  | 0                             | 0         | 0                                             | 0         | 1 (2%)                                         | 1 (2%)    |
| Infected skin ulcer <sup>a</sup> | 0                             | 0         | 1 (2%)                                        | 0         | 0                                              | 0         |
| Pneumonia primary<br>atypical    | 1 (2%)                        | 0         | 0                                             | 0         | 0                                              | 0         |
| Pulmonary embolism               | 0                             | 0         | 1 (2%)                                        | 1 (2%)    | 0                                              | 0         |

<sup>a</sup> Patient 724009006. This patient had a T4 tumor (protocol deviation) with a tumor with skin infiltration and secondary ulcer.
