# Supplementary material
Source: PubMed Central journal article supplement (PMC4971774)
Supplement: NIHMS806390-supplement-Supplementary_Table_S3.pdf [file NIHMS806390-supplement-Supplementary_Table_S3.pdf]

**Supplementary Table S3 - Overview of TEAEs - Safety population**

| <i>n</i> (%)                                                          | <b>PTX<br/>(<i>n</i>=46)</b> | <b>PWI<br/>(<i>n</i>=46)</b> | <b>PTI<br/>(<i>n</i>=48)</b> |
|-----------------------------------------------------------------------|------------------------------|------------------------------|------------------------------|
| Patients with any TEAE                                                | 43 (94%)                     | 45 (98%)                     | 47 (98%)                     |
| Patients with any grade 3-4 TEAE                                      | 5 (11%)                      | 5 (11%)                      | 16 (33%)                     |
| Patients with any treatment emergent SAE                              | 2 (4%)                       | 2 (4%)                       | 2 (4%)                       |
| Patients with any TEAE leading to death                               | 0                            | 0                            | 0                            |
| Patients with any Pre-specified monitoring Event                      | 0                            | 0                            | 0                            |
| Patients with any TEAE leading to permanent treatment discontinuation | 1 (2%)                       | 2 (4%)                       | 1 (2%)                       |
