# Supplementary material
Source: PubMed Central journal article supplement (PMC4971774)
Supplement: NIHMS806390-supplement-Supplementary_Table_S4.pdf [file NIHMS806390-supplement-Supplementary_Table_S4.pdf]

**Supplementary Table S4 - Overview of more frequent TEAEs (all and grade 3-4) - Safety population**

| PT n (%)                                        | PTX<br>(n=46) |           | PWI<br>(n=46) |           | PTI<br>(n=48) |           |
|-------------------------------------------------|---------------|-----------|---------------|-----------|---------------|-----------|
|                                                 | All grades    | Grade 3-4 | All grades    | Grade 3-4 | All grades    | Grade 3-4 |
| Any TEAE                                        | 43 (93%)      | 5 (11%)   | 45 (98%)      | 5 (11%)   | 47 (98%)      | 16 (33%)  |
| Infections and infestations                     | 15 (33%)      | 0         | 13 (28%)      | 0         | 12 (25%)      | 1 (2%)    |
| Neutropenia                                     | 2 (4%)        | 2 (4%)    | 3 (7%)        | 0         | 5 (10%)       | 5 (10%)   |
| Anaemia                                         | 1 (2%)        | 0         | 1 (2%)        | 0         | 3 (6%)        | 1 (2%)    |
| Immune system disorders                         | 2 (4%)        | 1 (2%)    | 2 (4%)        | 0         | 5 (10%)       | 0         |
| Metabolism and nutrition disorders              | 1 (2%)        | 0         | 2 (4%)        | 1 (2%)    | 6 (12%)       | 1 (2%)    |
| Nervous system disorders                        | 28 (62%)      | 1 (2%)    | 28 (61%)      | 0         | 30 (62%)      | 3 (6%)    |
| Neurotoxicity                                   | 4 (9%)        | 0         | 4 (9%)        | 0         | 2 (4%)        | 1 (2%)    |
| Vertigo                                         | 1 (2%)        | 0         | 0             | 0         | 5 (10%)       | 1 (2%)    |
| Vascular disorders                              | 7 (15%)       | 0         | 8 (17%)       | 0         | 11 (23%)      | 1 (2%)    |
| Respiratory, thoracic and mediastinal disorders | 12 (26%)      | 0         | 5 (11%)       | 1 (2%)    | 8 (17%)       | 0         |
| Diarrhea                                        | 8 (17%)       | 0         | 18 (39%)      | 1 (2%)    | 14 (29%)      | 0         |

| PT <i>n</i> (%)                                      | PTX<br>( <i>n</i> =46) |           | PWI<br>( <i>n</i> =46) |           | PTI<br>( <i>n</i> =48) |           |
|------------------------------------------------------|------------------------|-----------|------------------------|-----------|------------------------|-----------|
|                                                      | All grades             | Grade 3-4 | All grades             | Grade 3-4 | All grades             | Grade 3-4 |
| Injury, poisoning and<br>procedural<br>complications | 2 (4%)                 | 0         | 3 (6%)                 | 0         | 5 (10%)                | 1 (2%)    |

Only rows with frequency of at least 5% in at least one column are shown
