# Supplementary material
Source: PubMed Central journal article supplement (PMC4971774)
Supplement: NIHMS806390-supplement-Supplementary_Table_S5.pdf [file NIHMS806390-supplement-Supplementary_Table_S5.pdf]

**Supplementary Table S5 - Summary of neurotoxicity by PT (worst grade by patient) -**

**Safety population**

| PT <i>n</i> (%)               | PTX<br>( <i>n</i> =46) |           | PTW<br>( <i>n</i> =46) |           | PTI<br>( <i>n</i> =48) |           |
|-------------------------------|------------------------|-----------|------------------------|-----------|------------------------|-----------|
|                               | All grades             | Grade 3-4 | All grades             | Grade 3-4 | All grades             | Grade 3-4 |
| Any TEAE                      | 22 (48%)               | 0         | 19 (41%)               | 0         | 21 (44%)               | 1 (2%)    |
| Peripheral sensory neuropathy | 13 (28%)               | 0         | 10 (22%)               | 0         | 14 (29%)               | 0         |
| Paraesthesia                  | 8 (17%)                | 0         | 5 (11%)                | 0         | 4 (8%)                 | 0         |
| Neurotoxicity                 | 4 (9%)                 | 0         | 4 (9%)                 | 0         | 2 (4%)                 | 1 (2%)    |
| Hypoaesthesia                 | 0                      | 0         | 0                      | 0         | 2 (4%)                 | 0         |
| Neuropathy peripheral         | 0                      | 0         | 1 (2%)                 | 0         | 1 (2%)                 | 0         |
