# Supplementary material
Source: PubMed Central journal article supplement (PMC4971774)
Supplement: NIHMS806390-supplement-Supplementary_Table_S6.pdf [file NIHMS806390-supplement-Supplementary_Table_S6.pdf]

**Supplementary Table S6 - Number (%) of patients with hematology test and liver - renal function abnormalities on treatment - Safety population**

| Laboratory parameter     | PTX<br>(n=46) |           | PTW<br>(n=46) |           | PTI<br>(n=48) |           |
|--------------------------|---------------|-----------|---------------|-----------|---------------|-----------|
|                          | All grades    | Grade 3-4 | All grades    | Grade 3-4 | All grades    | Grade 3-4 |
| Anemia                   | 30 (65%)      | 0         | 34 (74%)      | 0         | 38 (79%)      | 0         |
| Leukopenia               | 30 (65%)      | 0         | 31 (67%)      | 0         | 35 (73%)      | 4 (8%)    |
| Lymphopenia              | 7 (15%)       | 0         | 15 (33%)      | 1 (2%)    | 14 (29%)      | 3 (6%)    |
| Neutropenia              | 18 (39%)      | 2 (4%)    | 18 (39%)      | 0         | 19 (40%)      | 6 (13%)   |
| Thrombocytopenia         | 2 (4%)        | 0         | 3 (7%)        | 0         | 0             | 0         |
| Alkaline phosphatase     | 7 (16%)       | 0         | 3 (7%)        | 0         | 3 (7%)        | 0         |
| Elevated ALT (SGPT-ALAT) | 20 (44%)      | 1 (2%)    | 18 (40%)      | 1 (2%)    | 18 (38%)      | 1 (2%)    |
| Elevated AST (SGOT-ASAT) | 13 (28%)      | 0         | 12 (27%)      | 0         | 9 (19%)       | 0         |
| Hyperbilirubinemia       | 1 (2%)        | 0         | 1 (2%)        | 0         | 4 (9%)        | 0         |
| Creatinine               | 2 (4%)        | 0         | 0             | 0         | 0             | 0         |
