# Supplementary material
Source: PubMed Central journal article supplement (PMC4971774)
Supplement: NIHMS806390-supplement-Supplementary_Table_S7.pdf [file NIHMS806390-supplement-Supplementary_Table_S7.pdf]

### Supplementary Table S7 - Axillary lymph node evaluation

| Axillary lymph node evaluation    |          |
|-----------------------------------|----------|
| Type and time of assesment        | Patients |
| SLNB at baseline only             | 16 (12%) |
| SLNB at baseline + surgery        | 13 (9%)  |
| SLNB at surgery                   | 26 (18%) |
| Axillary lymphadenectomy only     | 75 (53%) |
| SLNB at surgery + lymphadenectomy | 15 (11%) |
| SLNB with OSNA                    | 13 (9%)  |

SNLB=sentinel lymph node biopsy

OSNA=one-step nucleic acid amplification
